# Supplementary material for: Fibriform one-dimensional hydrogen-bonded network composed of 1,2-alt calix[4]arene tetra acetic acid
Source: Royal Society of Chemistry journal article supplement (doi:10.1039/b509092j), 2005-01-01
Supplement: b509092j-2.pdf [file b509092j-2.pdf]

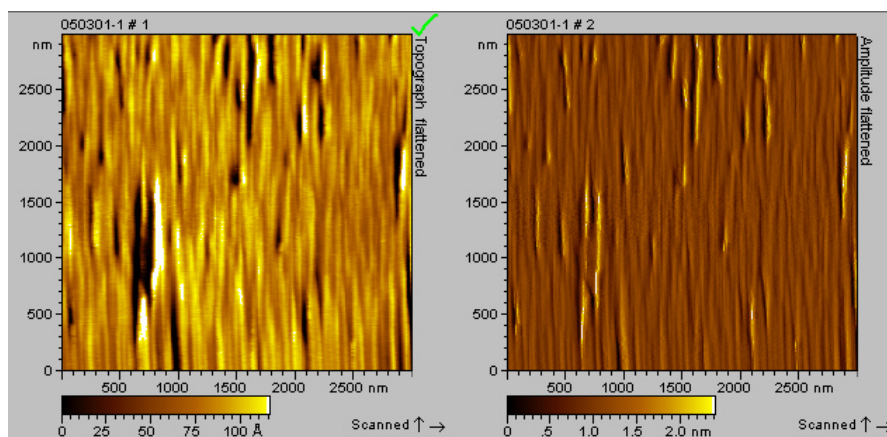

**Fig. 3** AFM micrographs and image of **3**, concentration= $10^{-6}$  mol L $^{-1}$ , fibre width *ca.* 50-100 nm.

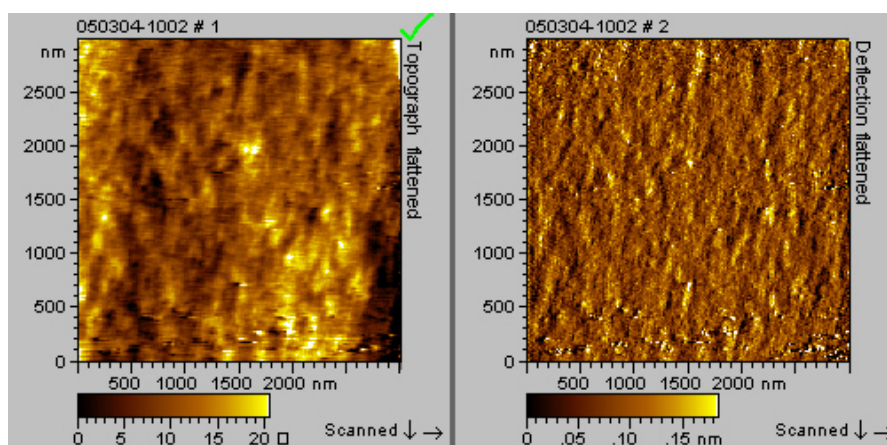

**Fig. 4** AFM micrographs and image of **4**, concentration= $10^{-6}$  mol L $^{-1}$ , no fibre observed.

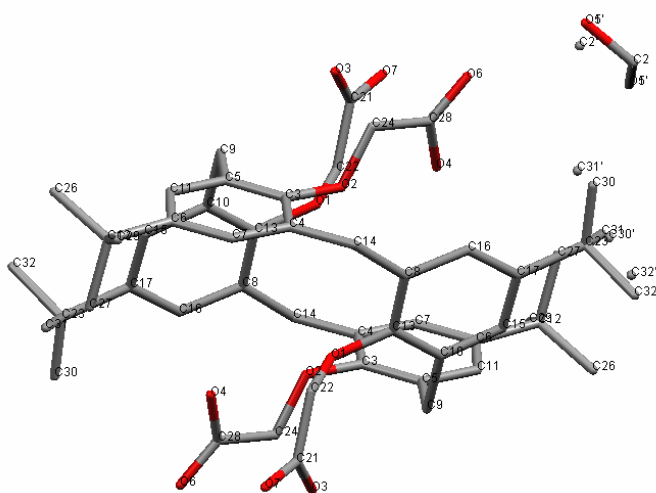

**Fig. 5** The molecular structure (Mercury1.21 Drawing) of **3** with hydrogen atoms omitted for clarity.

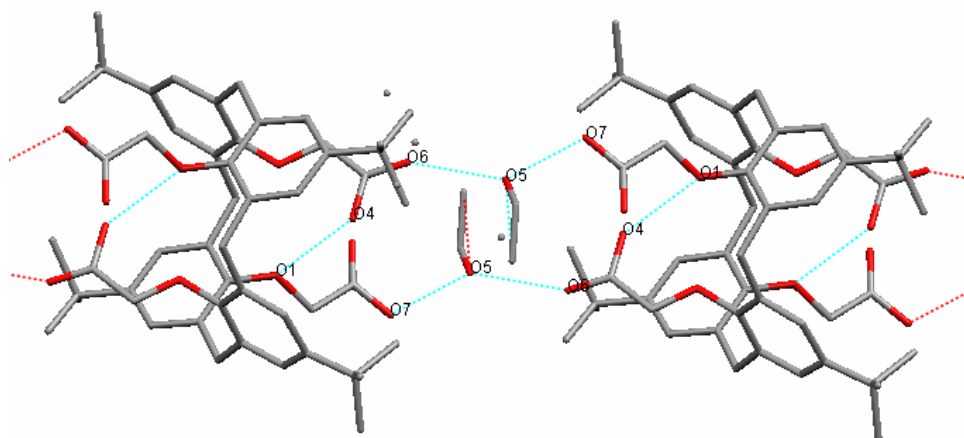

**Fig. 6** Projection showing the hydrogen-bonded network in the presence of ethanol. Hydrogen bonded interaction are shown as broken blue lines.

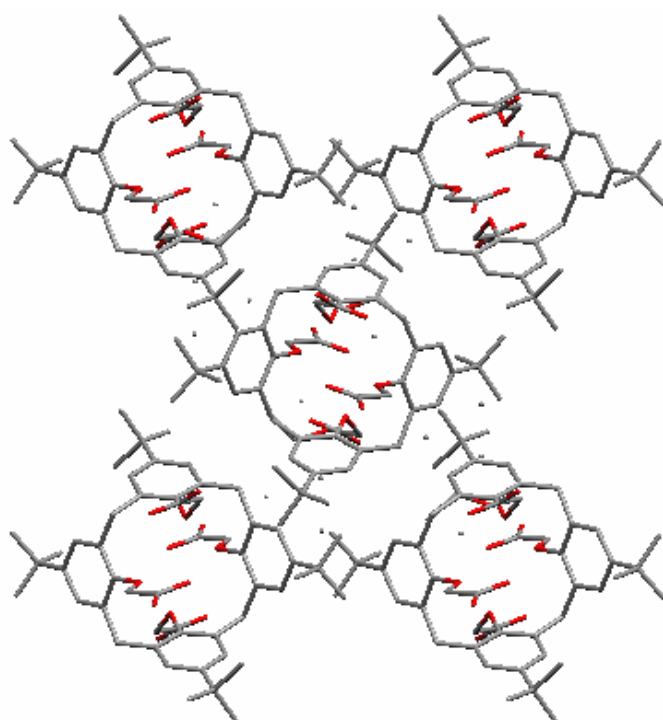

**Fig. 7** Packing diagram of **3** in front view parallel to a axis.
