# Supplementary material for: Fibriform one-dimensional hydrogen-bonded network composed of 1,2-alt calix[4]arene tetra acetic acid
Source: Royal Society of Chemistry journal article supplement (doi:10.1039/b509092j), 2005-01-01

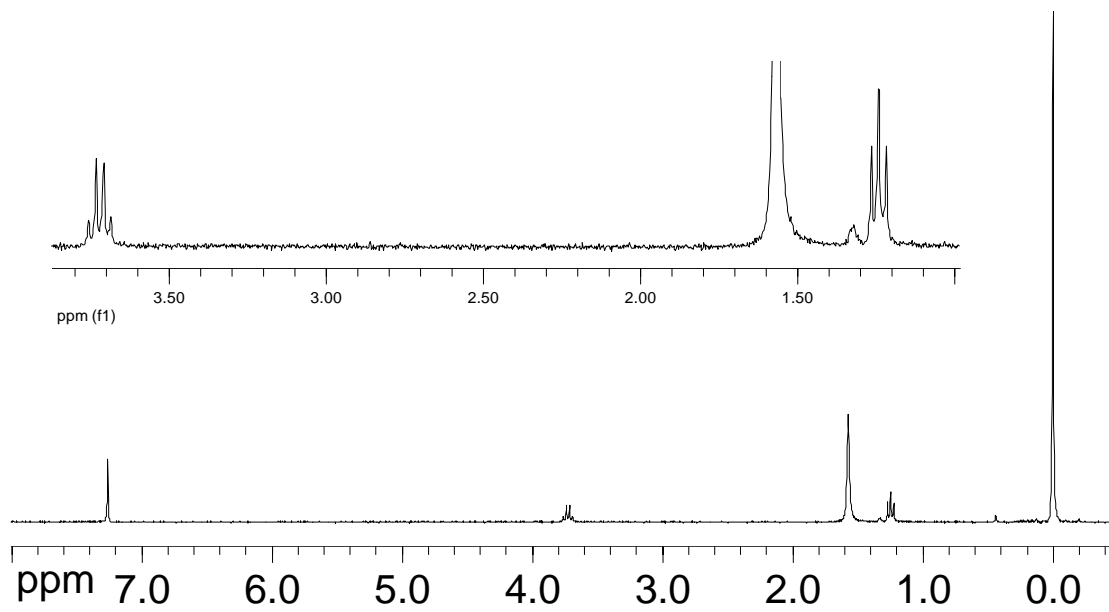

<sup>1</sup>H NMR of compound 3 in pure CDCl<sub>3</sub> (produced by MestRec 4.27)

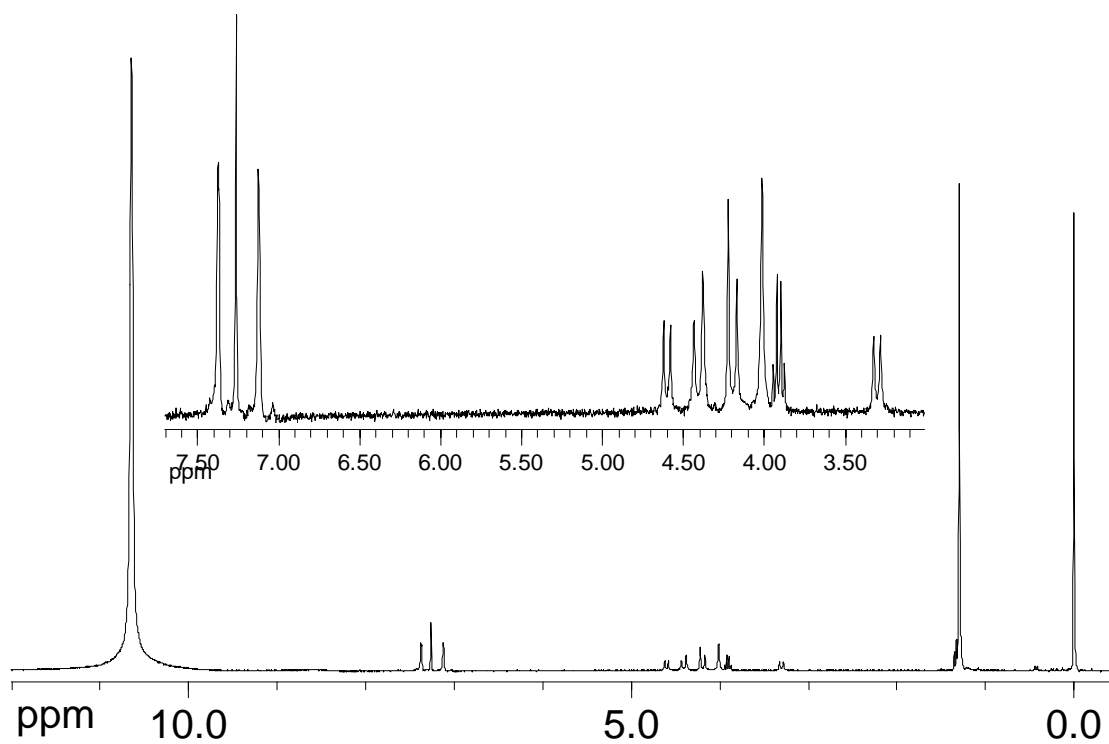

<sup>1</sup>H NMR of compound 3 in pure CDCl<sub>3</sub> plus minor CF<sub>3</sub>COOH (produced by MestRec 4.27)

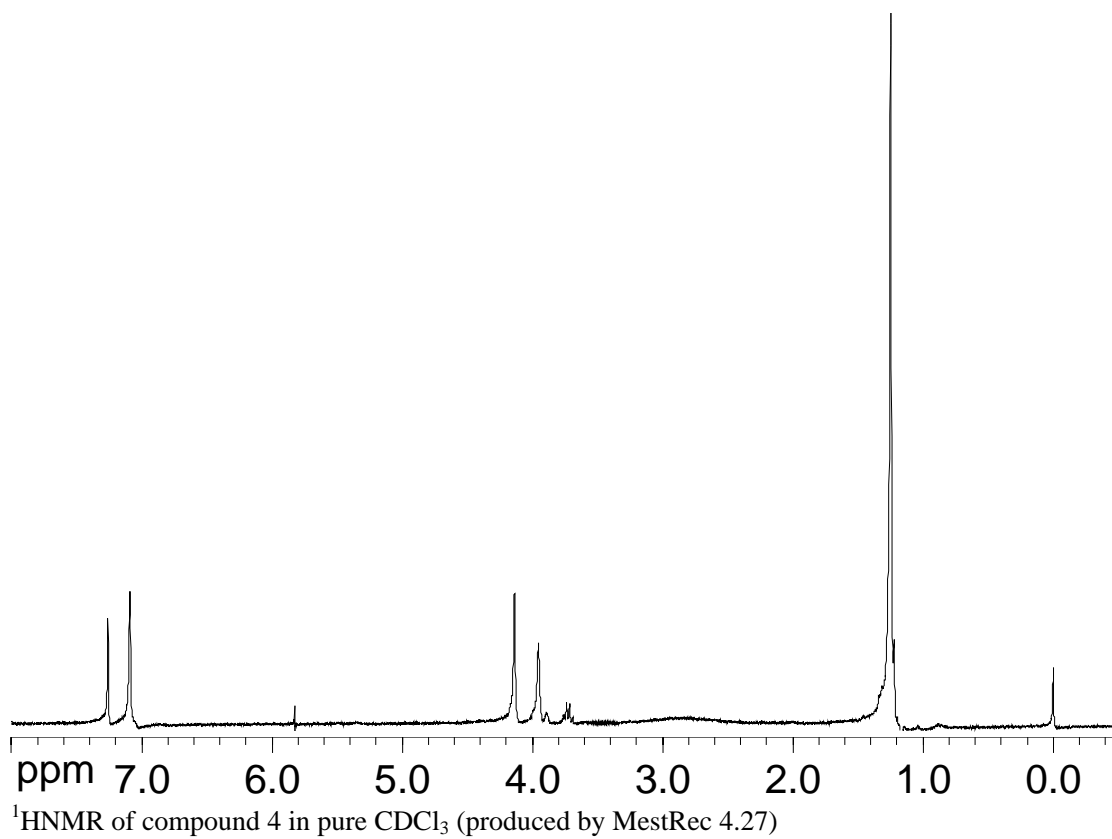

Supplement: b509092j.pdf [file b509092j.pdf]
